# Supplementary material
Source: PubMed Central journal article supplement (PMC6960473)

## Supplementary Material

**Supplementary Table 1. Factors associated with uMRD attainment in the peripheral blood or bone marrow in patients who had not achieved uMRD after 12 months of venetoclax.**

|                                        |   |    | Association with PB/BM uMRD attainment |              |
|----------------------------------------|---|----|----------------------------------------|--------------|
| Variable                               |   | N= | Cause specific HR (95%CI)              | P value      |
| Age ≥ 65                               | Y | 24 | 1.40 (0.49-4.00)                       | 0.532        |
|                                        | N | 17 |                                        |              |
| ≥4 Prior Lines of Therapy              | Y | 15 | 0.55 (0.17-1.77)                       | 0.307        |
|                                        | N | 26 |                                        |              |
| Fludarabine Refractory                 | Y | 17 | 0.30 (0.08-1.14)                       | <b>0.061</b> |
|                                        | N | 24 |                                        |              |
| Bulky Disease                          | Y | 16 | 1.33 (0.45-3.93)                       | 0.599        |
|                                        | N | 25 |                                        |              |
| Rituximab Combination Therapy          | Y | 9  | 3.11 (1.00-9.73)                       | <b>0.039</b> |
|                                        | N | 34 |                                        |              |
| Dose ≥400 mg                           | Y | 30 | 1.64 (0.44-5.76)                       | 0.439        |
|                                        | N | 11 |                                        |              |
| Del(17p) and / or <i>TP53</i> Mutation | Y | 21 | 0.381 (0.13-1.11)                      | <b>0.067</b> |
|                                        | N | 19 |                                        |              |
| Complex Karyotype                      | Y | 10 | 0.00 (undefined)                       | <b>0.015</b> |
|                                        | N | 19 |                                        |              |
| Prior navitoclax                       | Y | 6  | 0.00 (undefined)                       | <b>0.085</b> |
|                                        | N | 35 |                                        |              |

**Supplementary Table 2. Factors associated with MRD recrudescence in the peripheral blood.**

|                                        |   |    | Association with MRD recrudescence |              |
|----------------------------------------|---|----|------------------------------------|--------------|
| Variable                               |   | N= | HR (95%CI)                         | P value      |
| Age $\geq$ 65                          | Y | 16 | 1.40 (0.43-4.59)                   | 0.578        |
|                                        | N | 10 |                                    |              |
| $\geq$ 4 Prior Lines of Therapy        | Y | 8  | 2.71 (0.51-14.44)                  | 0.225        |
|                                        | N | 18 |                                    |              |
| Fludarabine Refractory                 | Y | 9  | 0.54 (0.11-2.72)                   | 0.457        |
|                                        | N | 17 |                                    |              |
| Bulky Disease                          | Y | 10 | 0.86 (0.20-3.78)                   | 0.843        |
|                                        | N | 16 |                                    |              |
| Rituximab Combination Therapy          | Y | 9  | 0.71 (0.17-2.94)                   | 0.638        |
|                                        | N | 17 |                                    |              |
| Dose $\geq$ 400mg                      | Y | 19 | 1.73 (0.33-8.91)                   | 0.510        |
|                                        | N | 7  |                                    |              |
| Del(17p) and / or <i>TP53</i> Mutation | Y | 10 | 3.48 (0.75-16.08)                  | <b>0.089</b> |
|                                        | N | 14 |                                    |              |
| Complex Karyotype                      | Y | 4  | 3.01 (0.66-14.39)                  | 0.131        |
|                                        | N | 13 |                                    |              |
| Prior navitoclax                       | Y | 1  | 5.33 (0.58-49.21)                  | <b>0.098</b> |
|                                        | N | 25 |                                    |              |
| uMRD < 18 months                       | Y | 14 | 1.13 (0.26-4.87)                   | 0.873        |
|                                        | N | 12 |                                    |              |

### Supplementary Figure 1.

Spaghetti plot of peripheral blood MRD burden after 24 months with ongoing venetoclax.

n=30. Curves terminated at time of last follow up or cessation of drug. Unrecordable MRD plotted at 0.0001 on y-axis.

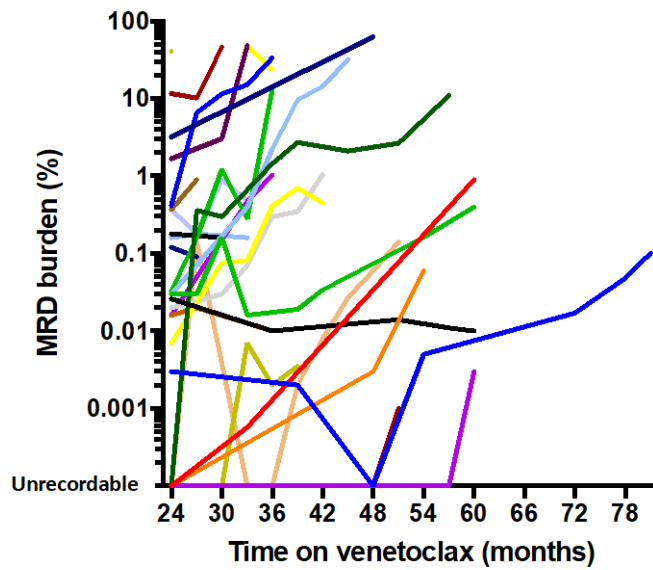

Supplement: baADV2019000864-suppl1.pdf [file baADV2019000864-suppl1.pdf]
